# Supplementary material for: Subepicardial endothelial cells invade the embryonic ventricle wall to form coronary arteries
Source: PubMed Central journal article supplement — Cell Res. 2013 Jun 25;23(9):1075–90. doi: 10.1038/cr.2013.83 (PMC3760626; doi:10.1038/cr.2013.83), 2013-06-25
Supplement: cr201383x1.pdf [file cr201383x1.pdf]

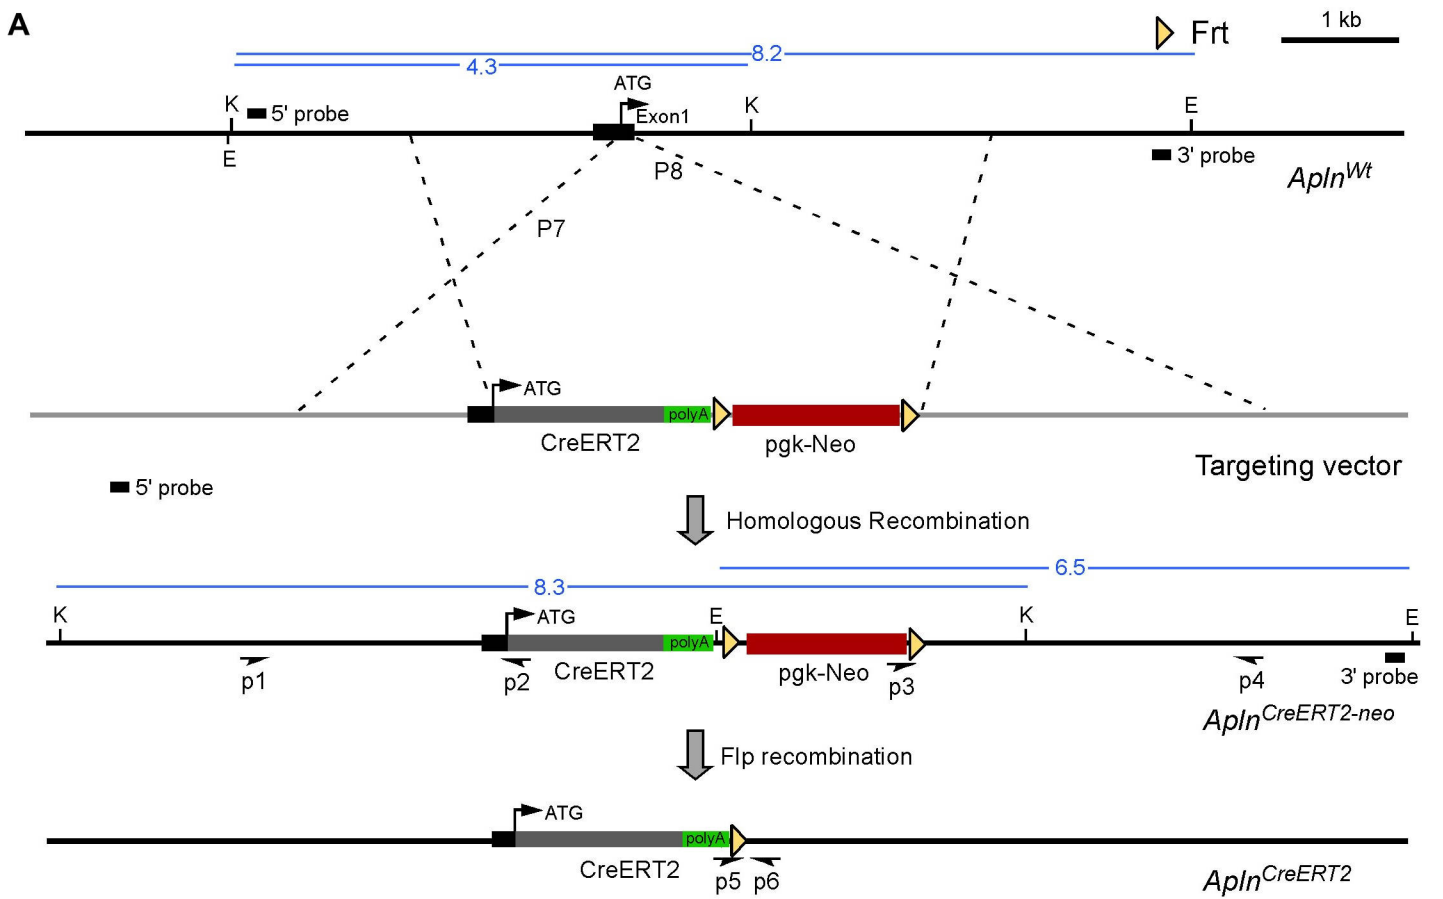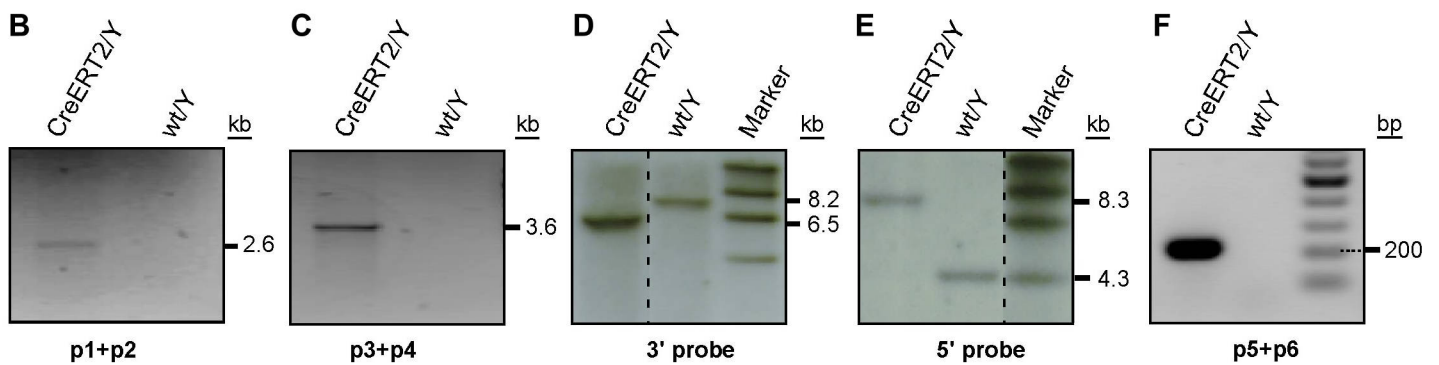

**Supplementary information, Figure S1** Generation of *ApIn*<sup>CreERT2/Y</sup> knockin mouse line. **(A)** CreERT2 cDNA was knocked into the endogenous start codon of *ApIn* gene on X chromosome by homologous recombination, resulting in deletion of the first coding exon. Neo resistant gene was removed afterwards. K, KpnI; E, EcoRI. **(B and C)** Correct gene targeting was screened by long PCR. **(D and E)** Correct gene targeting was confirmed by southern blotting. **(F)** Genotyping by allele-specific PCR of *ApIn*<sup>CreERT2/Y</sup> line.
