# Supplementary material for: Subepicardial endothelial cells invade the embryonic ventricle wall to form coronary arteries
Source: PubMed Central journal article supplement — Cell Res. 2013 Jun 25;23(9):1075–90. doi: 10.1038/cr.2013.83 (PMC3760626; doi:10.1038/cr.2013.83), 2013-06-25
Supplement: cr201383x2.pdf [file cr201383x2.pdf]

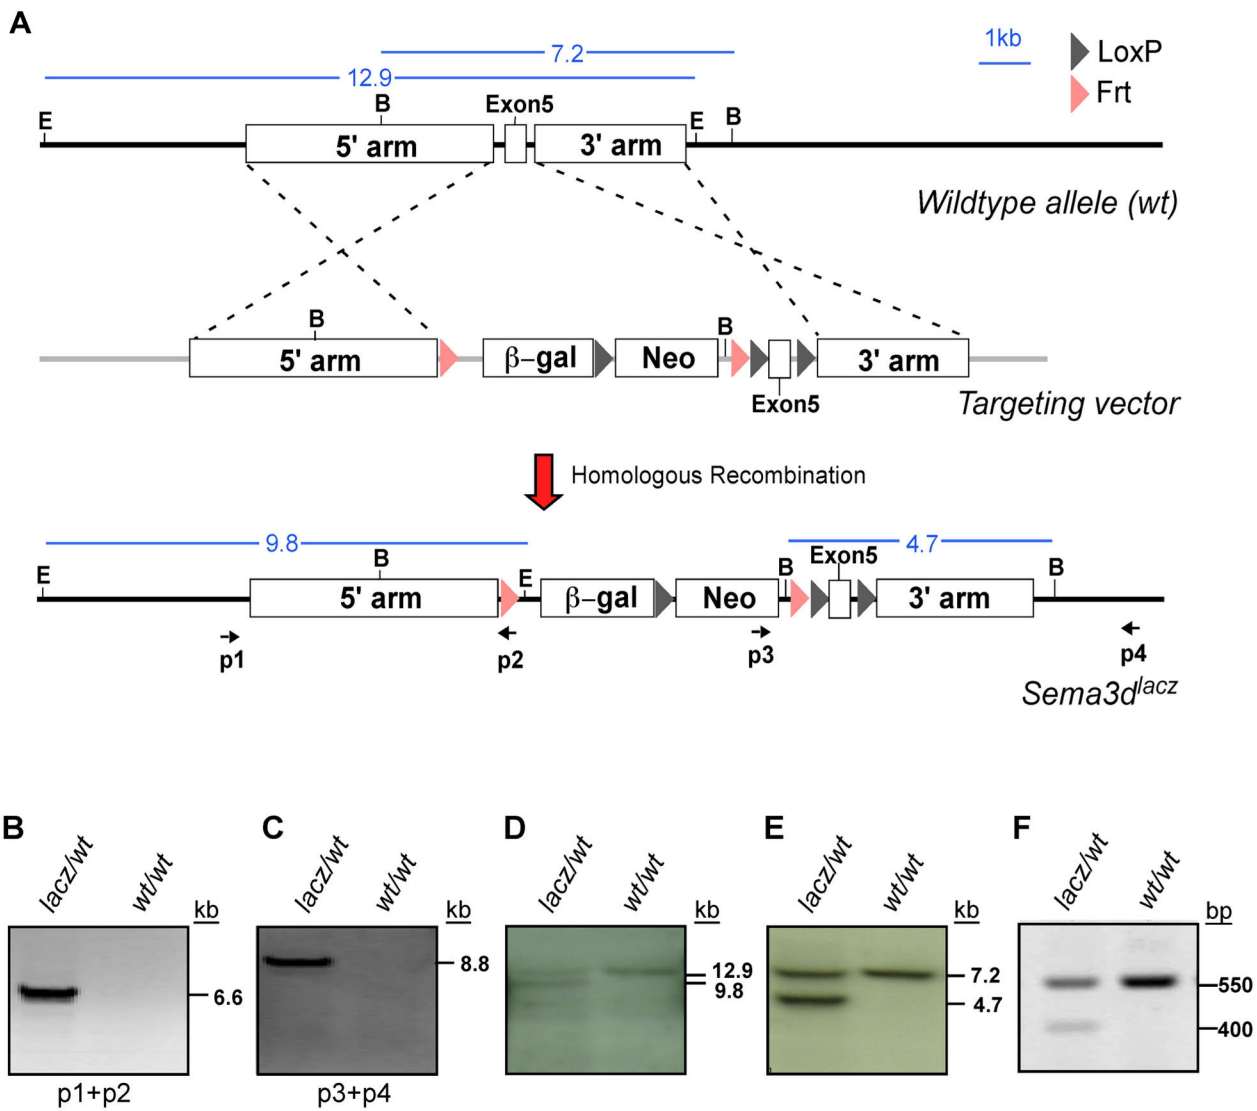

**Supplementary information, Figure S2** Generation of *Sema3d<sup>LacZ/+</sup>* knockin mouse line. **(A)** Beta-gal and Neo was knocked into *Sema3d* locus by homologous recombination. E, EcoRI; B, BamHI. **(B and C)** Correct gene targeting was screened by long PCR. **(D and E)** Correct gene targeting was confirmed by southern blotting. **(F)** Genotyping by allele-specific PCR of *Sema3d<sup>LacZ/+</sup>* line.
