# Supplementary material for: Subepicardial endothelial cells invade the embryonic ventricle wall to form coronary arteries
Source: PubMed Central journal article supplement — Cell Res. 2013 Jun 25;23(9):1075–90. doi: 10.1038/cr.2013.83 (PMC3760626; doi:10.1038/cr.2013.83), 2013-06-25
Supplement: cr201383x3.pdf [file cr201383x3.pdf]

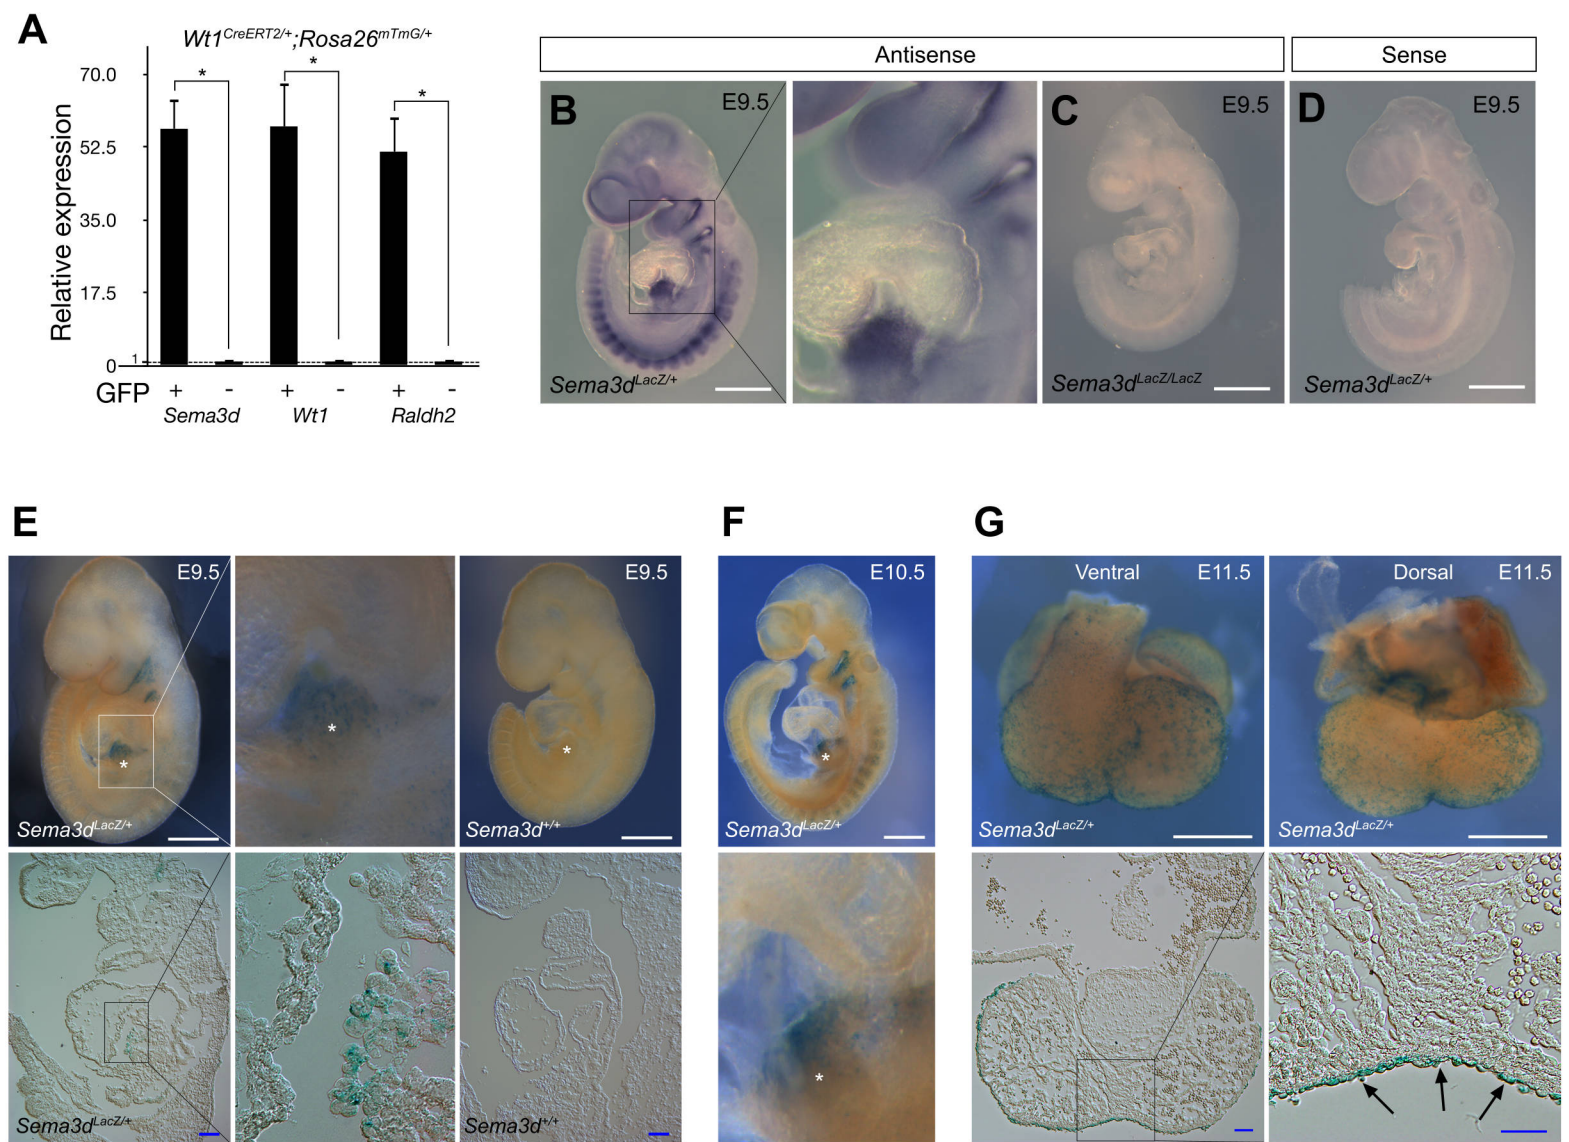

**Supplementary information, Figure S3** Characterization of *Sema3d*<sup>LacZ/+</sup> knockin line. **(A)** Epicardium-derived cells (EPDCs, GFP<sup>+</sup>) were sorted from E15.5 *Wt1*<sup>CreERT2/+</sup>;*Rosa26*<sup>mTmG/+</sup> heart apex. Tamoxifen was induced at E10.5. Similar to *Wt1* and *Raldh2*, *Sema3d* is highly enriched in epicardium and EPDCs (GFP<sup>+</sup>) compared with non-epicardium cells (GFP<sup>-</sup>). \**P* < 0.05, n = 3. **(B-D)** In situ hybridization of *Sema3d* shows strong expression in the proepicardium (\*) at E9.5 embryo. Similar results were observed with 4 different antisense probes. The same antisense probe does not detect any signal in *Sema3d* null embryos (*Sema3d*<sup>LacZ/LacZ</sup>), and the sense probe is always negative. **(E-G)** X-gal staining of *Sema3d* showed beta-galactosidase expression in the proepicardium (white asterisks) and epicardium (black arrows) at E9.5 (E), E10.5 (F) and E11.5 (G). White bar = 0.5 mm; blue bar = 100 μm.
