# Supplementary material for: Subepicardial endothelial cells invade the embryonic ventricle wall to form coronary arteries
Source: PubMed Central journal article supplement — Cell Res. 2013 Jun 25;23(9):1075–90. doi: 10.1038/cr.2013.83 (PMC3760626; doi:10.1038/cr.2013.83), 2013-06-25
Supplement: cr201383x4.pdf [file cr201383x4.pdf]

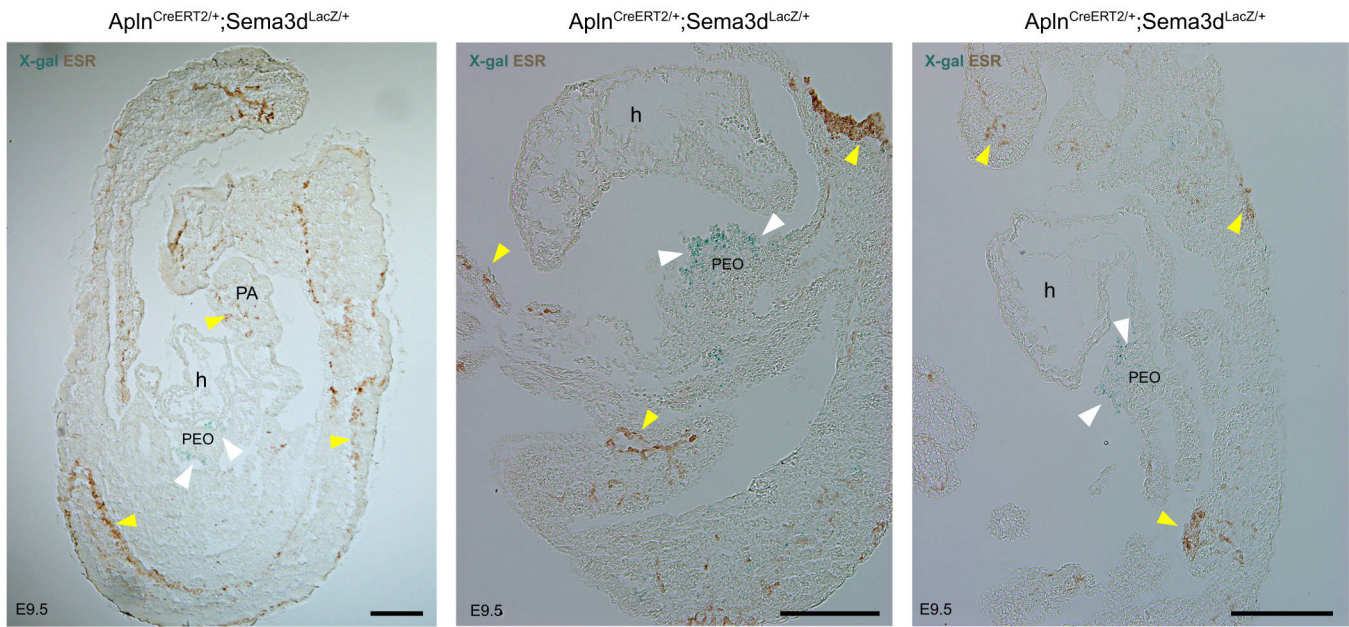

**Supplementary information, Figure S4** X-gal and ESR double staining on E9.5  $Apln^{CreERT2/+};Sema3d^{LacZ/+}$  embryos show no overlapping signal on proepicardial cells (PEO, white arrowheads). Yellow arrowheads denote the  $Apln^+$  (ESR) cells in other region of embryos. black bar = 200  $\mu m$ . PA, pharyngeal arch; h, heart; PEO, proepicardium.
