# Supplementary material for: Subepicardial endothelial cells invade the embryonic ventricle wall to form coronary arteries
Source: PubMed Central journal article supplement — Cell Res. 2013 Jun 25;23(9):1075–90. doi: 10.1038/cr.2013.83 (PMC3760626; doi:10.1038/cr.2013.83), 2013-06-25
Supplement: cr201383x5.pdf [file cr201383x5.pdf]

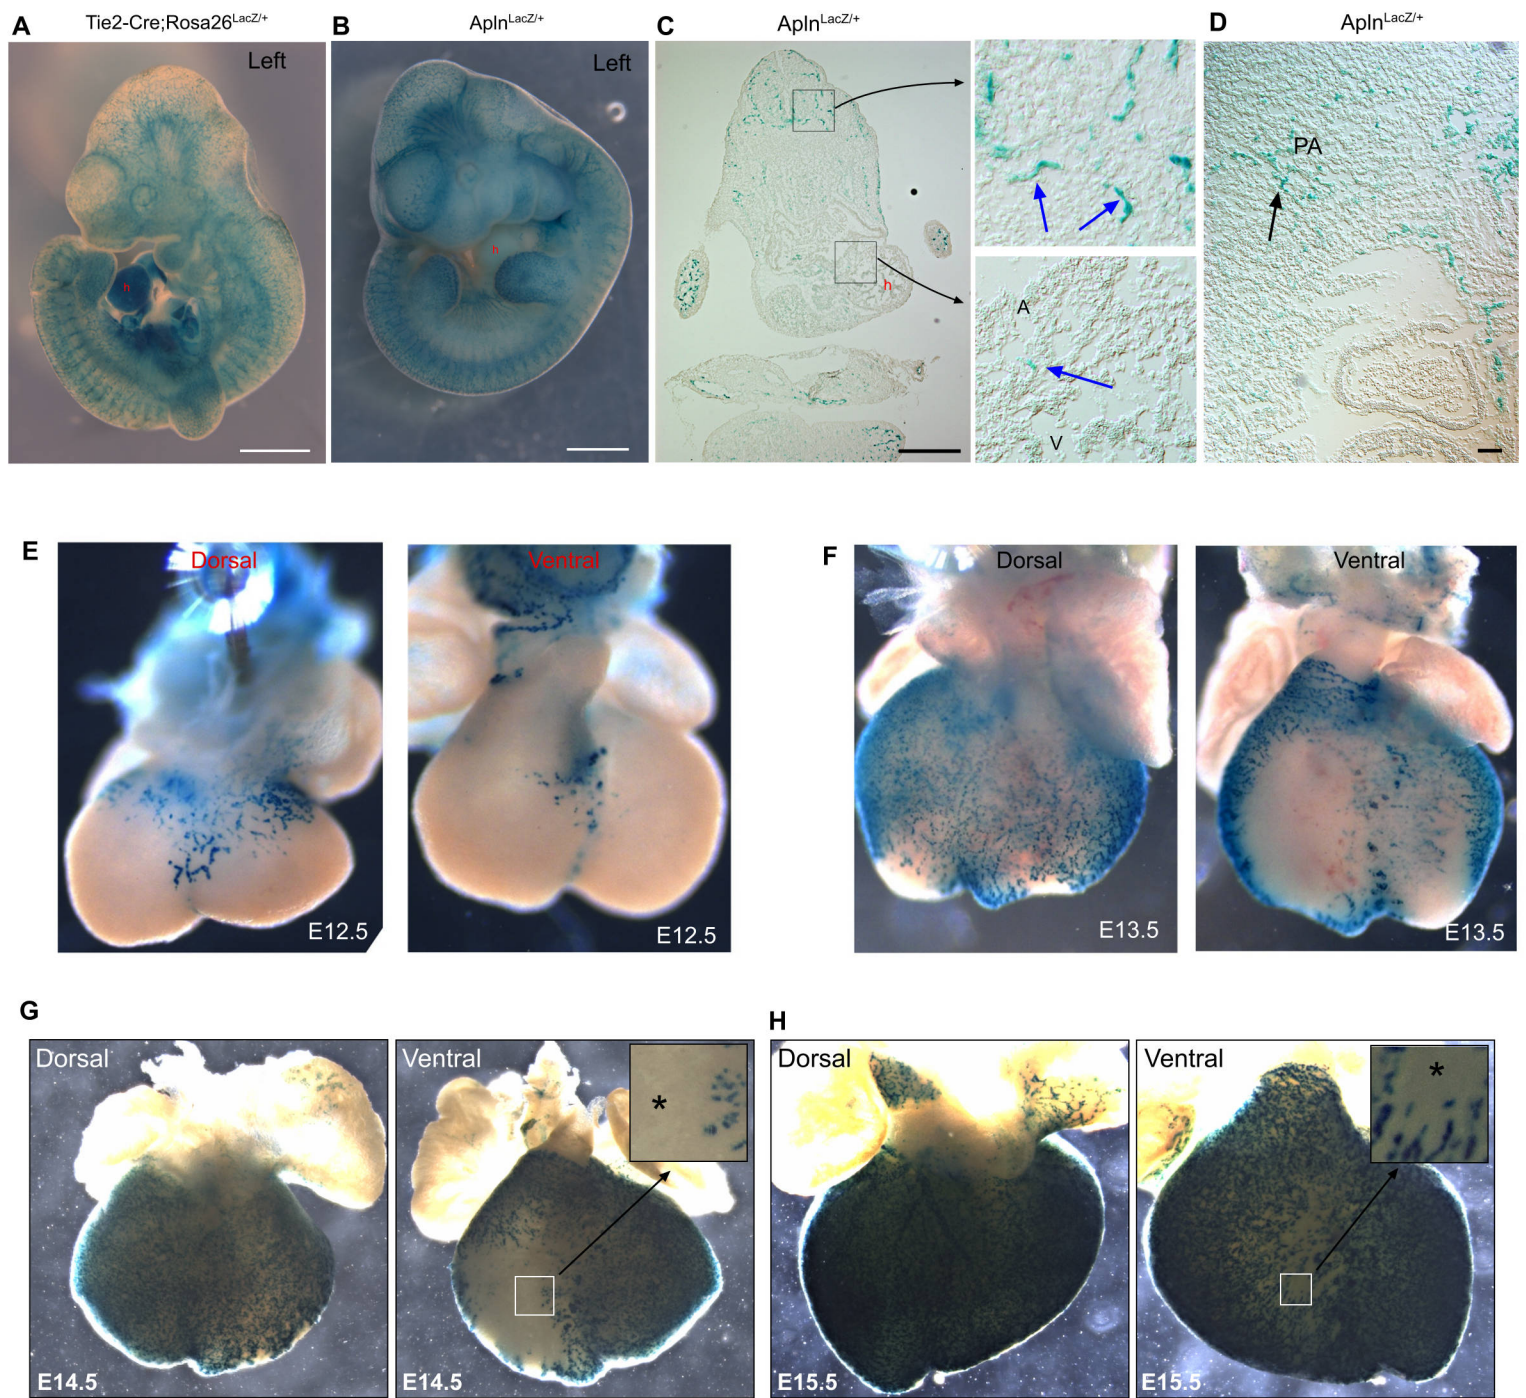

**Supplementary information, Figure S5** *Apln* expression map by *Apln<sup>LacZ/+</sup>* line. **(A)** Wholemount X-gal staining of E12.0 *Tie2-Cre;Rosa26<sup>LacZ/+</sup>* embryo. Endocardium was positive for x-gal staining in the heart (h). **(B-C)** Wholemount and sectional X-gal staining of E11.5 *Apln<sup>LacZ/+</sup>* embryo shows vessel patterning of *Apln* expression. Endocardium was negative for x-gal staining in the heart (h), while blue arrows indicate *Apln<sup>+</sup>* endothelial cells. A, atrium; V, ventricle. **(D)** *Apln* is expressed in a subset of endothelial cells in pharyngeal arch (black arrow). **(E-H)** E12.5, E13.5, E14.5 and E15.5 *Apln<sup>LacZ/+</sup>* hearts stained with X-gal showed vessel patterning of *Apln<sup>+</sup>* cells, and also no *Apln<sup>+</sup>* coronary vessels in part of region on ventral side (\*). White bar = 1 mm; black bar = 0.5 mm. PA, pharyngeal arch; A, atrium; V, ventricle.
