# Supplementary material for: Subepicardial endothelial cells invade the embryonic ventricle wall to form coronary arteries
Source: PubMed Central journal article supplement — Cell Res. 2013 Jun 25;23(9):1075–90. doi: 10.1038/cr.2013.83 (PMC3760626; doi:10.1038/cr.2013.83), 2013-06-25
Supplement: cr201383x6.pdf [file cr201383x6.pdf]

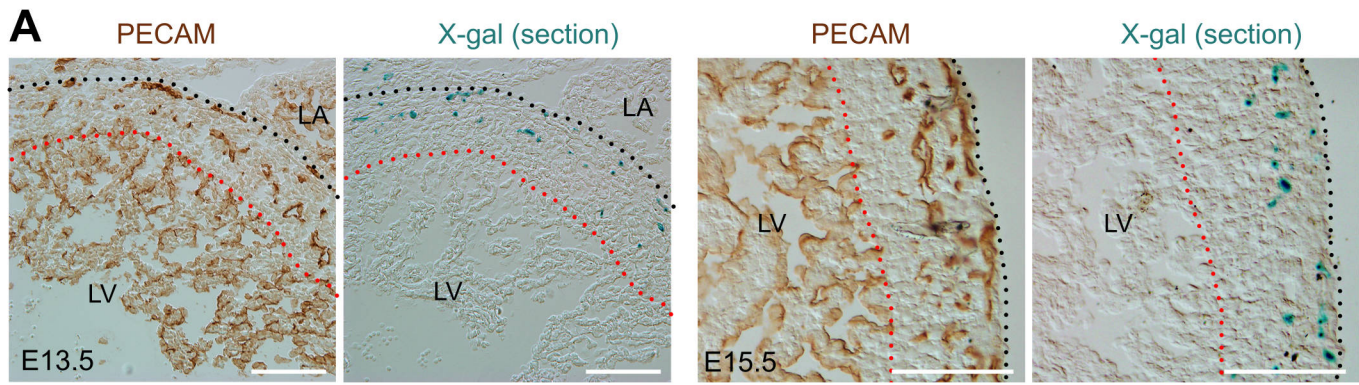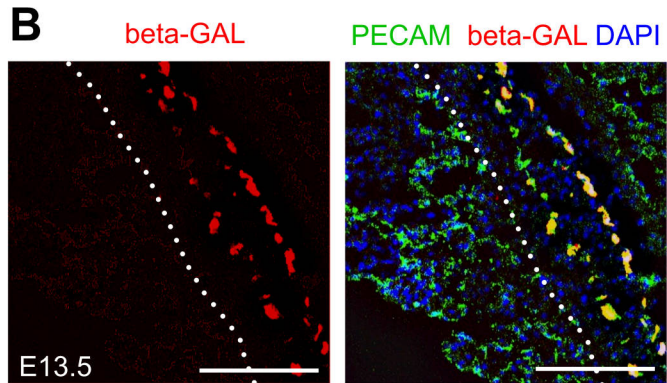

**Supplementary information, Figure S6** Fate map of  $Apln^{CreERT2/+}$  by  $Rosa26^{LacZ/+}$  reporter. **(A)** E13.5 and E15.5 consecutive heart sections stained with PECAM and x-gal. Red dotted lines indicate the border between trabecular and compact myocardium; black dotted lines indicate epicardium.  $Apln$ -derived cells (X-gal<sup>+</sup>) are detected within compact myocardium, but not in endocardial cells. **(B)** E13.5 heart section stained with endothelial marker PECAM (green) and fate map genetic marker beta-GAL (red). White bar = 100  $\mu$ m. LV, left ventricle; LA, left atrium.
