# Supplementary material for: Subepicardial endothelial cells invade the embryonic ventricle wall to form coronary arteries
Source: PubMed Central journal article supplement — Cell Res. 2013 Jun 25;23(9):1075–90. doi: 10.1038/cr.2013.83 (PMC3760626; doi:10.1038/cr.2013.83), 2013-06-25
Supplement: cr201383x8.pdf [file cr201383x8.pdf]

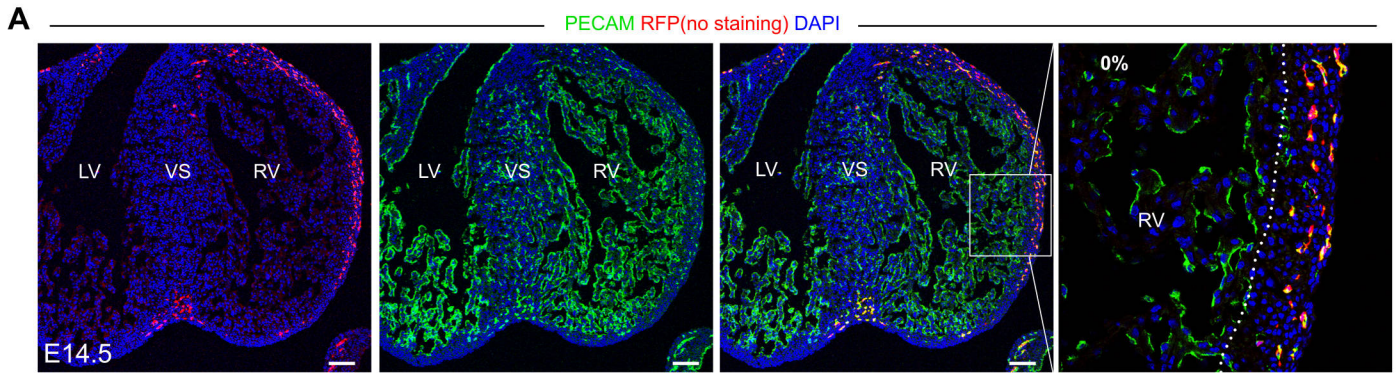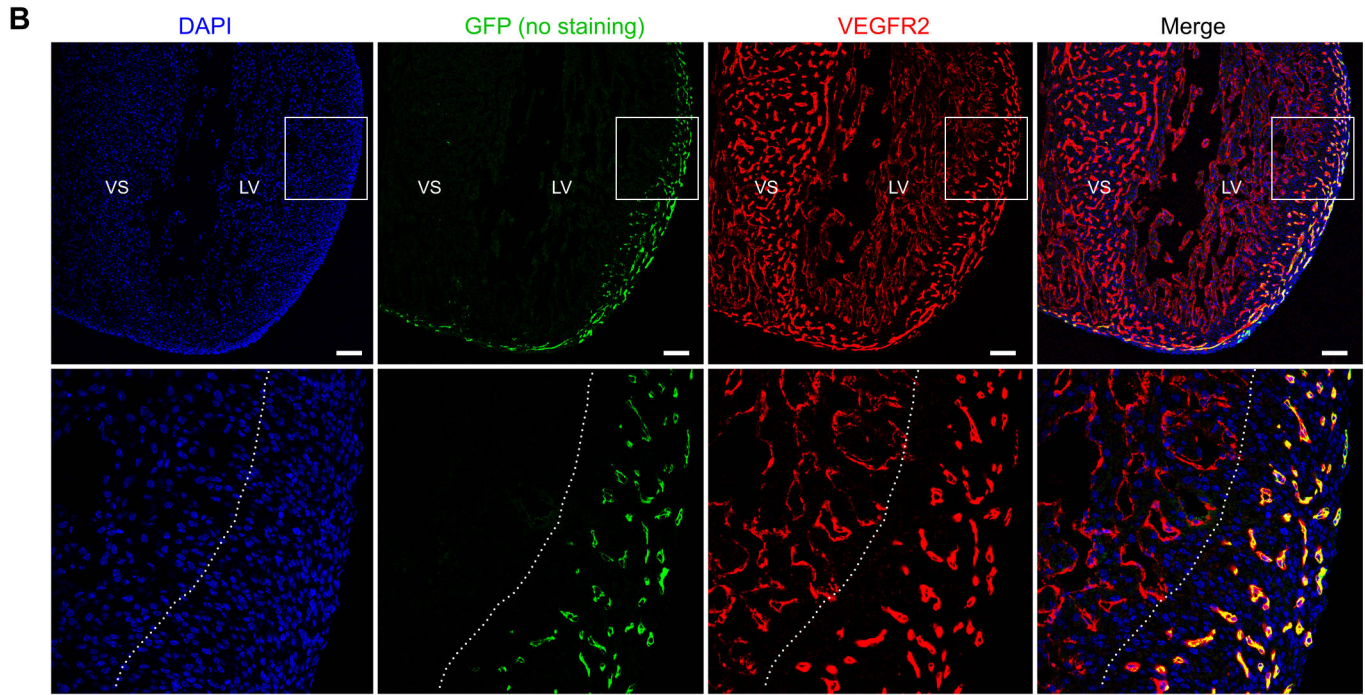

**Supplementary information, Figure S8** Fate map of  $Apln^{CreERT2/+}$  by  $Rosa26^{RFP/+}$  and  $Rosa26^{mTmG/+}$  line. **(A)** Immunostaining of PECAM (green) on  $Apln^{CreERT2/+}; Rosa26^{RFP/+}$  heart section. RFP is endogenous lineage trace marker with no staining (red). Dotted line demarcates the border between trabecular and compact myocardium. **(B)** Immunostaining of VEGFR2 (red) on E15.5  $Apln^{CreERT2/+}; Rosa26^{mTmG/+}$  heart section. GFP is endogenous lineage trace marker with no staining (green). Dotted line demarcates the border between trabecular and compact myocardium. White bar = 100  $\mu$ m. LV, left ventricle; RV, right ventricle; VS, ventricular septum.
