# Supplementary material for: Subepicardial endothelial cells invade the embryonic ventricle wall to form coronary arteries
Source: PubMed Central journal article supplement — Cell Res. 2013 Jun 25;23(9):1075–90. doi: 10.1038/cr.2013.83 (PMC3760626; doi:10.1038/cr.2013.83), 2013-06-25
Supplement: cr201383x9.pdf [file cr201383x9.pdf]

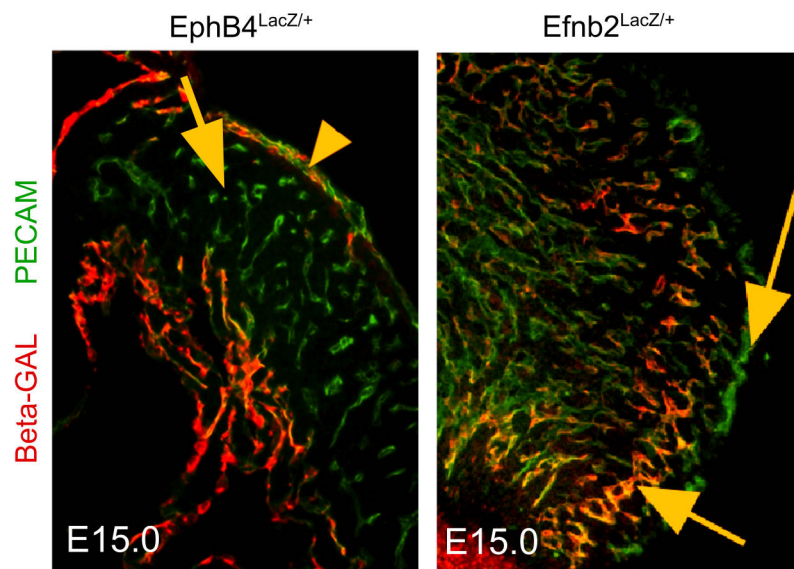

**Supplementary information, Figure S9** Beta-GAL and PECAM staining of E15.0  $EphB4^{LacZ/+}$  and  $Efnb2^{LacZ/+}$  hearts. Subepicardial ECs (yellow arrowheads) express the vein marker EphB4, and intramyocardial ECs (yellow arrows) express artery marker Efnb2.
