# Supplementary material for: Subepicardial endothelial cells invade the embryonic ventricle wall to form coronary arteries
Source: PubMed Central journal article supplement — Cell Res. 2013 Jun 25;23(9):1075–90. doi: 10.1038/cr.2013.83 (PMC3760626; doi:10.1038/cr.2013.83), 2013-06-25
Supplement: cr201383x10.pdf [file cr201383x10.pdf]

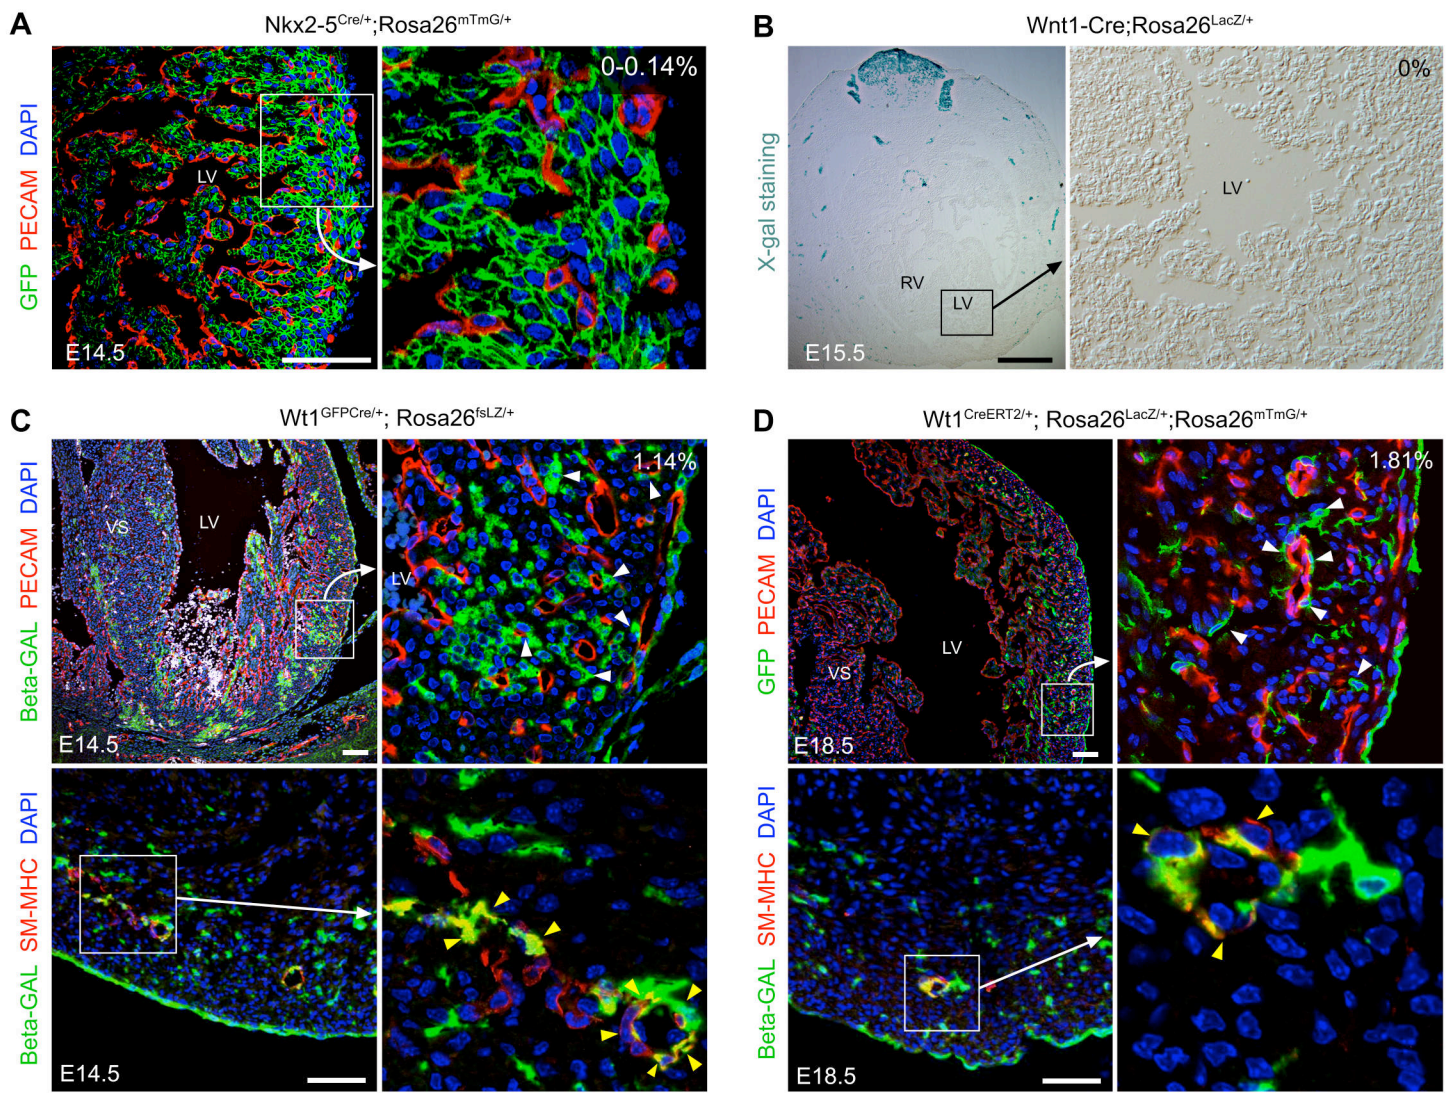

**Supplementary information, Figure S10** Fate mapping of coronary endothelial cells from various cardiac lineages. **(A)** 1st heart field-derived cells (Nkx2-5-traced) do not contribute ECs to the coronary vasculature. **(B)** No cells from the Wnt-1-expressing neural crest lineage give rise to coronary ECs. **(C, D)** Epicardium-derived cells labeled with  $Wt1^{GFP-Cre/+}$  or  $Wt1^{CreERT2/+}$  do not contribute to coronary ECs (white arrowheads, upper panels), contribute heavily to vascular smooth muscle (yellow arrowheads, lower panels). Percentage of lineage-traced coronary ECs are printed in the upper right hand corner of high magnification views. Black bar = 500  $\mu$ m; white bar = 100  $\mu$ m.
