# Supplementary material for: Subepicardial endothelial cells invade the embryonic ventricle wall to form coronary arteries
Source: PubMed Central journal article supplement — Cell Res. 2013 Jun 25;23(9):1075–90. doi: 10.1038/cr.2013.83 (PMC3760626; doi:10.1038/cr.2013.83), 2013-06-25
Supplement: cr201383x11.pdf [file cr201383x11.pdf]

**List of antibodies used in the study.**

| <b>Name</b>                         | <b>Sources</b>     | <b>Catalog number</b> | <b>Species</b>     | <b>Dilution</b> |
|-------------------------------------|--------------------|-----------------------|--------------------|-----------------|
| PECAM                               | BD biosciences     | 553370                | Rat                | 1:500           |
| Beta-GAL                            | MP biomedicals     | 55976                 | Rabbit             | 1:5000          |
| GFP                                 | Invitrogen         | A11122                | Rabbit             | 1:200           |
| GFP                                 | abcam              | ab6673                | Goat               | 1:100           |
| RFP                                 | Rockland           | 600-401-379           | Rabbit             | 1:100           |
| NOTCH1                              | Santa cruz Biotech | sc-6014-R             | Rabbit             | 1:100           |
| COUP TF II                          | R & D              | PP-H7147              | Mouse              | 1:100           |
| ISLET1                              | DSHB               | 39.4D5-S              | Mouse              | 1:100           |
| MEF2C                               | Santa cruz Biotech | sc-13266              | Goat               | 1:100           |
| TBX18                               | Santa cruz Biotech | sc-17869              | Goat               | 1:100           |
| VEGFR2                              | BD biosciences     | 550549                | Rat                | 1:500           |
| ESR                                 | Abcam              | ab27595               | Rabbit             | 1:100           |
| RALDH2                              | Sigma              | HPA010022             | Rabbit             | 1:100           |
| WT1                                 | Santa cruz Biotech | sc-192                | Rabbit             | 1:100           |
| NFATc1                              | BD pharmingen      | 556602                | Mouse              | 1:100           |
| SMAActin alpha                      | Sigma              | c6198                 | Mouse              | 1:100           |
| NKX2-5                              | Santa cruz Biotech | sc-8697               | Goat               | 1:100           |
| ACTN2                               | Sigma              | A2543                 | Mouse              | 1:100           |
| TNNI3                               | Abcam              | ab56357               | Goat               | 1:100           |
| TNNT2                               | Thermo scientific  | MS-295-P1             | Mouse              | 1:100           |
| ABC-HRP                             | Vector lab         | PK-7100               | Secondary antibody | Kit protocol    |
| ABC-AP                              | Vector lab         | AK-5000               | Secondary antibody | Kit protocol    |
| Anti-rat-HRP IgG                    | Vector lab         | MP-7444               | Secondary antibody | Kit protocol    |
| Anti-rabbit-HRP IgG                 | Vector lab         | MP-7401               | Secondary antibody | Kit protocol    |
| Anti-mouse-HRP IgG                  | Vector lab         | MP-7402               | Secondary antibody | Kit protocol    |
| Anti-goat-HRP IgG                   | Vector lab         | MP-7405               | Secondary antibody | Kit protocol    |
| Biotin-anti-rat IgG                 | JIR                | 712-065-153           | Secondary antibody | Kit protocol    |
| Biotin-anti-rabbit IgG              | JIR                | 711-065-152           | Secondary antibody | Kit protocol    |
| Chrompure rabbit IgG                | JIR                | 011-000-003           | Secondary antibody | 1:100           |
| F(ab') <sub>2</sub> anti-rabbit IgG | JIR                | 711-006-152           | Secondary antibody | 1:50            |
| F(ab') <sub>2</sub> anti-mouse IgG  | JIR                | 715-007-003           | Secondary antibody | 1:50            |
| Alexa anti-mouse 488                | Invitrogen         | A21202                | Secondary antibody | 1:1000          |
| Alexa anti-mouse 555                | Invitrogen         | A31570                | Secondary antibody | 1:1000          |
| Alexa anti-mouse 647                | Invitrogen         | A31571                | Secondary antibody | 1:1000          |
| Alexa anti-rabbit 488               | Invitrogen         | A21206                | Secondary antibody | 1:1000          |
| Alexa anti-rabbit 555               | Invitrogen         | A31572                | Secondary antibody | 1:1000          |
| Alexa anti-rabbit 647               | Invitrogen         | A31573                | Secondary antibody | 1:1000          |
| Alexa anti-goat 488                 | Invitrogen         | A11055                | Secondary antibody | 1:1000          |
| Alexa anti-goat 555                 | Invitrogen         | A21432                | Secondary antibody | 1:1000          |
| Alexa anti-goat 633                 | Invitrogen         | A21447                | Secondary antibody | 1:1000          |
| Alexa anti-rat 488                  | Invitrogen         | A11006                | Secondary antibody | 1:1000          |

Supplementary information, Table S2

**Primer sequence**

| <b>GENES</b>        | <b>Forward</b>           | <b>Backward</b>          |
|---------------------|--------------------------|--------------------------|
| <i>Gapdh</i>        | GAAGGGCTCATGACCACAG      | GATGCAGGGATGATGTTCTG     |
| <i>Wt1</i>          | AGACACACAGGTGTGAAACCA    | ATGAGTCCTGGTGTGGGTCT     |
| <i>Wt1</i>          | GCCTTCACCTTGCACTTCTC     | GACCGTGCTGTATCCTTGGT     |
| <i>Raldh2</i>       | TGGCAGAACTCAGAGAGTGG     | CCACCTTGTCTGCTTCTTGA     |
| <i>Apln set1</i>    | GTTGCAGCATGAATCTGAGG     | TCAGTGGCACTCCACAACT      |
| <i>Apln set2</i>    | AGTTTGTGGAGTGCCACTGA     | GTAGCGCATGCTTCCTTCTT     |
| <i>Pecam</i>        | CTCCAAAGCCAGTAGCATCA     | AGGACAGGTCCAACAACCTCC    |
| <i>Vegfr2</i>       | CCATTGGAGGAACCAGAAGT     | CTCTTCTGATGCAAGGACCA     |
| <i>Nfatc1 set1</i>  | CTGGCCATAACTTTCTGCAA     | CTTCCATCTCCCAGACGTG      |
| <i>Nfatc1 set2</i>  | ACCTGTGCAAGCCAAATTC      | ACGCTGGTACTGGCTTCTCT     |
| <i>Sema3d set1</i>  | GAGCATCGAGAGGAGTTGAA     | AAGTGTGCTCCTGTGCTTTG     |
| <i>Sema3d set2</i>  | CTAAATCCCAACAAGCCTCTG    | TTCAACTCCTCTCGATGCTC     |
| <i>Apln set3*</i>   | GGAAAGGAAAAGCGACAAGAGTTG | CAGTTCTGATGGAATGGTGGTCC  |
| <i>Apln set4*</i>   | TCATCCGTGTGCTTCAACCC     | ATCATACTGCCCGTCTTCAGCGAC |
| <i>Sema3d set3*</i> | CAGTACTGTGAGCAGATGTG     | CATTACTGCAGTACACTAGATG   |
| <i>Sema3d set4*</i> | CAGGAAGGCAGTACTTCTGAC    | GTTCAAGATAGCTGTTGGGTG    |
| <i>Sema3d set5*</i> | TAGAGAGTTTTTGCCGCCGACC   | TTTCACTTAGGGACTATTCCG    |
| <i>Sema3d set6*</i> | GGTGAAGAAGGAAGGAGAGATGG  | GCAAACCTGGCTAAAAAGTCCCG  |

\*primers for *in situ* hybridization. Others are for PCR.

**Supplementary information, Table S3**

**Coronary Clones generated by  $Apln^{CreERT2/+}; Rosa26^{Rainbow/+}$**

| Embryonic ID<br>$Apln^{CreERT2/+};$<br>$Rosa26^{Rainbow/+}$ | Clone number | Cell number | Distribution of marked cells         |                                  |             |
|-------------------------------------------------------------|--------------|-------------|--------------------------------------|----------------------------------|-------------|
|                                                             |              |             | Coronary artery<br>(intramyocardium) | Coronary vein<br>(subepicardium) | Endocardium |
| 1                                                           | 1            | 205         | 167                                  | 38                               | 0           |
| 2                                                           | 1            | 210         | 177                                  | 33                               | 0           |
| 3                                                           | 1            | 140         | 122                                  | 18                               | 0           |
| 4                                                           | 1            | 90          | 70                                   | 20                               | 0           |
| 5                                                           | 1            | 248         | 208                                  | 40                               | 0           |
| 6                                                           | 1            | 158         | 128                                  | 30                               | 0           |
| 7                                                           | 2            | 117         | 97                                   | 20                               | 0           |
|                                                             |              | 76          | 60                                   | 16                               | 0           |
| 8                                                           | 2            | 148         | 120                                  | 28                               | 0           |
|                                                             |              | 130         | 105                                  | 25                               | 0           |
| 9                                                           | 2            | 90          | 78                                   | 12                               | 0           |
|                                                             |              | 112         | 84                                   | 28                               | 0           |
| 10                                                          | 3            | 83          | 69                                   | 14                               | 0           |
|                                                             |              | 72          | 60                                   | 12                               | 0           |
|                                                             |              | 80          | 66                                   | 14                               | 0           |
| 11                                                          | 3            | 95          | 73                                   | 22                               | 0           |
|                                                             |              | 289         | 239                                  | 50                               | 0           |
|                                                             |              | 56          | 50                                   | 6                                | 0           |
| 12                                                          | 3            | 298         | 246                                  | 52                               | 0           |
|                                                             |              | 205         | 171                                  | 34                               | 0           |
|                                                             |              | 124         | 100                                  | 24                               | 0           |
| 13                                                          | 3            | 98          | 82                                   | 16                               | 0           |
|                                                             |              | 123         | 105                                  | 18                               | 0           |
|                                                             |              | 130         | 116                                  | 14                               | 0           |
| 14                                                          | 4            | 78          | 62                                   | 16                               | 0           |
|                                                             |              | 131         | 105                                  | 26                               | 0           |
|                                                             |              | 154         | 132                                  | 22                               | 0           |
| 15-85                                                       | 0            | 297         | 261                                  | 36                               | 0           |
|                                                             |              | 0           | 0                                    | 0                                | 0           |
